# Supplementary material for: Sexual Harassment Experience, Coping, and Awareness Among Nurses Working in Small- and Medium-Sized Hospitals in South Korea
Source: PubMed Central journal article supplement — SAGE Open Nurs. 2024 Sep 27;10:23779608241281129. doi: 10.1177/23779608241281129 (PMC11437590; doi:10.1177/23779608241281129), 2024-09-27
Supplement: sj-pdf-2-son-10.1177_23779608241281129.pdf [file sj-pdf-2-son-10.1177_23779608241281129.pdf]

## 연구 대상자 동의 설명서

### 제목: 중소병원 간호사의 성희롱에 대한 대처의도에 미치는 영향 요인

|         |     |          |                 |
|---------|-----|----------|-----------------|
| 연구 책임자명 | 정계현 | 연구 참여 기간 | 2019.01-2019.06 |
|---------|-----|----------|-----------------|

귀하께서는 본 연구에 참여하시도록 제안 받았습니다.

이 연구는 참여자의 권리를 보호할 책임이 있는 대전대학교 기관생명윤리위원회 (IRB)의 승인을 받은 연구입니다.

아래의 내용은 이번 연구의 목적과 귀하의 권리 및 역할 등에 대하여 설명 드리고자 마련된 것입니다. 귀하가 연구 참여 동의 전에 이 동의서를 읽고 이해하는 것이 중요합니다. 시간을 가지고 충분히 심사숙고 하시어 읽으신 후, 원하신다면 가족이나 다른 사람과 상의하셔도 좋고, 또 궁금하신 사항이 있으시면 연구책임자나 다른 연구담당자에게 질문하셔도 좋습니다.

#### 1. 연구의 목적(이 연구는 왜 실시합니까?)

중소병원 간호사들의 성희롱 인식, 경험과 피해의 영향, 기관의 성희롱 예방에 대한 실태를 조사하고 성희롱 예방 프로그램 개발의 기초 자료로 제공하고자 합니다.

#### 2. 피험자 선정 기준

참여대상자 선정 기준은 중소병원에 재직 중인 경력 1년 이상의 간호사입니다.

#### 3. 피험자 정보 및 수(얼마나 많은 사람이 참여 합니까?)

본 연구에 참여하는 대상자는 현재 중소병원에 재직 중인 경력 1년 이상의 간호사 450명이 참여할 것으로 예상됩니다.

#### 4. 피험자 연구 참여 예정기간 및 참여 시간

본 연구는 2019년 01월 부터 2019년 06월 31일 사이에 진행될 예정이며, 설문지를 통해 자료를 수집할 것입니다.

#### 5. 연구 절차(만일 연구에 참여하면 어떤 과정이 진행 됩니까?)

연구 절차는 구조화된 설문지를 통해 조사될 예정이며, 자료조사 시간은 약 15분가량 소요될 예정입니다.

#### 6. 연구 동의 후 철회(참여 도중 그만두어도 됩니까?)

설문조사를 참여하시다가 참여가 어려우시면, 본인 의사를 통해 참여 철회를 하셔도 됩니다.

#### 7. 연구에 참여함으로써 예상되는 위험성이나 불편 사항(부작용이나 위험요소는 없습니까?)

본 연구의 자료조사 과정에서 자신들의 경험에 대한 진술하는 과정을 의해 심리적 불편감 또는 불쾌감을 경험할 수 있습니다. 신체적 · 정신적 문제가 발생한 경우 연구자에게 즉시 연락하고, 연구자는 이를 해결하기 위해 응급조치 및 진료를 볼 수 있도록 할 예정입니다.

#### 8. 연구와 관련된 피해 발생 시 보상

연구 참여과정에서 연구참여와 관련하여 신체적 · 정신적 문제가 발생한 경우 이에 대한 치료비용은 연구자가 부담하겠습니다.

**9. 귀하의 인적사항에 대한 비밀보장(연구에서 얻은 모든 개인 정보의 비밀은 보장됩니까?)**

본 연구를 통해 취득하게 된 귀하의 자료와 모든 결과는 연구 목적 이외에는 일체 사용하지 않을 것임을 알려드립니다. 본 연구를 통해 귀하의 신원을 파악할 수 있는 기록은 비밀로 보장될 것이며, 연구의 결과가 출판될 경우 귀하의 신원은 비밀이 유지될 것입니다.

본 연구에 관련된 의뢰자, 모니터 및 점검자는 본 연구의 모니터링과 점검 및 진행사항 관리를 위한 목적으로 대상자의 기록을 열람할 수 있습니다. 귀하는 대상자 동의서에 서명함으로써, 국내의 법규와 윤리적 측면에서 연구 의뢰자 또는 연구수탁기관이 모니터 및 점검자가 대상자의 차트와 관련 기록을 검증하기 위하여 해당문서를 검토하거나 복사할 수 있음을 인정합니다. 이러한 정보들은 기밀로 보관됩니다.

**10. 연구 대상자에 제공되는 편의(이 연구에 참여시 참여자에게 이득이 있습니까?)**

본 연구에 참여 시 중소병원 간호사의 성희롱에 대한 인식과 피해 정도를 생각해볼 수 있는 기회를 가지므로 성희롱 대처를 상기 시키는데 도움이 될 수 있을 것으로 사료됩니다.

**11. 연구 대상자 연구 불참 시 불이익(만일 이 연구에 참여하지 않는다면 불이익이 있습니까?)**

귀하는 본 연구에 참가해야 할 어떤 의무는 없습니다. 귀하가 참가에 동의하는가 하지 않는가 여부는 귀하가 생활을 하는데 어떠한 영향도 끼치지 않습니다. 귀하가 참가를 선택하는 경우에도, 어느 때라도 중도에 참여를 중단할 수 있습니다. 또한 이로 인한 불이익이나 차별은 없음을 알려 드립니다.

**12. 연구 참여 댓가 지급 여부 (이 연구에 참가하면 댓가가 지급됩니까?)**

연구 참여시 자료수집 종료 후 연구자가 준비한 소정의 선물이 지급됨을 알려드립니다.

**13. 각 연구 관련 / 책임자(연구에 대한 문의는 어떻게 합니까?)**

본 연구에 대해 의문점이나 추가적인 정보를 얻고자 하시면, 지금 말씀하십시오. 또한 이후에라도 의문점이 있으시면 아래의 연락처로 연락해 주시기 바랍니다.

※ 본 연구에 대해 질문이 있거나 연구 중간에 문제가 생길 시 다음 연구 담당자에게 연락하십시오.

|          |     |      |              |
|----------|-----|------|--------------|
| 연구책임자 이름 | 정계현 | 전화번호 | 042-280-2650 |
| 연구담당자 이름 | 최윤정 | 전화번호 | 042-606-1400 |
| 연구담당자 이름 | 엄동춘 | 전화번호 | 042-280-2941 |

※ 만일 어느 때라도 피험자로서 귀하의 권리에 대한 질문이 있다면 다음의 대전대학교 기관생명윤리위원회에 연락하십시오.

대전대학교 기관생명윤리위원회 전화번호 : 042)280-2607

[연구대상자 동의서]

동 의 서

제목: 중소병원 간호사의 성희롱에 대한 대처의도에 미치는 영향 요인

1. 나는 이 설명을 읽었으며 담당 조사원과 이에 대하여 의논하였습니다.
2. 나는 위험과 이득에 관하여 들었으며 나의 질문에 만족할 만한 답변을 얻었습니다.
3. 나는 이 연구에 참여하는 것에 대하여 자발적으로 동의합니다.
4. 나는 나의 사진 및 동영상 자료를 촬영하는 것에 대하여 자발적으로 동의합니다.
5. 나는 이 구술에서 제공된 나에 대한 정보나 관련 사진 및 동영상 자료를 현행 법률과 대전대학교 기관생명윤리위원회 규정이 허용하는 범위 내에서 연구자가 수집하고 처리하는 데 동의합니다.
6. 나는 담당 연구자나 위임받은 대리인이 연구를 진행하거나 결과 관리를 하는 경우와 학교 당국 및 대전대 학교 기관생명윤리위원회가 실태 조사를 하는 경우에는 비밀로 유지되는 나의 개인 신상 정보를 열람하는 것에 동의합니다.
7. 나는 언제라도 이 사업에의 참여를 철회할 수 있고 이러한 결정이 나에게 어떠한 해도 되지 않을 것이라는 것을 압니다.
8. 나의 서명은 이 동의서의 사본을 받았다는 것을 뜻하며 사업 참여가 끝날 때까지 사본을 보관하겠습니다.

|               |            |                                                                                          |                           |
|---------------|------------|------------------------------------------------------------------------------------------|---------------------------|
| [구술자]         | 성명 : _____ | 서명 : _____                                                                               | 날짜 : _____년 _____월 _____일 |
| [동의받은 조사원 성명] | 성명 : 최윤정   | 서명 : 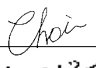 | 날짜 : _____년 _____월 _____일 |
| [연구책임자]       | 성명 : 정계현   | 서명 : 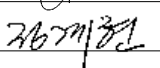 | 날짜 : _____년 _____월 _____일 |

※ 해당되는 경우

|          |            |            |                           |
|----------|------------|------------|---------------------------|
| [법적 대리인] | 성명 : _____ | 서명 : _____ | 날짜 : _____년 _____월 _____일 |
| [입회인]    | 성명 : _____ | 서명 : _____ | 날짜 : _____년 _____월 _____일 |

**19. 사용할 설문지 첨부(해당 시 필수)**

I. 다음은 귀하의 일반적 특성을 묻는 질문입니다. 잘 읽고 적합한 곳에 V 표를 해 주십시오.

1. 귀하의 성별은? ① 남      ② 여
2. 귀하의 연령은? (만                  세)
3. 귀하의 총 병원 경력은? (                  년                  월)
4. 귀하가 현재 근무하고 있는 부서는 무엇입니까? (                                  )
5. 귀하의 근무 형태는? ① 낮 상근 근무    ② 3교대 근무    ③ 2교대 근무    ④ 기타(                  )
6. 귀하가 근무 중 성희롱 예방 관련 교육을 받은 경험이 있습니까? ① 유        ② 무
7. (10번에서 ‘유’라고 응답한 경우) 성희롱 예방 관련 교육을 받은 횟수는 총 몇 번 인가요? (                  )회

다음은 성희롱에 대한 귀하의 인식에 관련된 문항입니다.

각 질문에 가장 적합하다고 생각하시는 하나의 항목을 선택하시어 해당 칸에 V 표를 해 주시기 바랍니다.

| 성희롱 인식                                                                    | 예 | 아니요 | 모르겠다 |
|---------------------------------------------------------------------------|---|-----|------|
| 1. 성희롱은 사회적 문제이므로 개인적 차원에서 해결해야 한다.                                       |   |     |      |
| 2. 성희롱인지 아닌지를 판단하는 기준은 피해자가 어떤 영향을 받았는가 보다는 가해자가 성희롱을 할 의도가 있었는지의 여부에 있다. |   |     |      |
| 3. 성희롱 관련 상담 내용은 비밀이 보장된다.                                                |   |     |      |
| 4. 성희롱은 남녀 차별의 한 형태이다.                                                    |   |     |      |
| 5. 사무실에서 통신으로 음란사이트를 혼자 보고 있는데 다른 사람이 이를 우연히 보았다면 이것도 성희롱에 해당될 수 있다.      |   |     |      |
| 6. 성적인 농담도 성희롱에 해당될 수 있다.                                                 |   |     |      |
| 7. 성희롱이 성립되기 위해서는 반드시 물리적인 신체 접촉이 수반되어야 한다.                               |   |     |      |
| 8. 성희롱을 당한 남성도 「국가인권위원회법」에 의거하여 법적 보호를 받는다.                               |   |     |      |
| 9. 성희롱을 당한 피해자가 거부 의사를 명확하게 표현하지 않았다면 자신의 피해를 성희롱으로 문제 삼을 수 없다.           |   |     |      |
| 10. 공공기관의 장과 사용자는 성희롱 예방을 위한 조치를 취할 법적 의무를 진다.                            |   |     |      |

다음은 성희롱에 대한 귀하의 경험에 관련된 문항입니다. 최근 다음과 같은 타인의 행동으로 인해 불쾌하거나 당황한 경우가 얼마나 있었는지 해당 칸에 V 표를 해 주시기 바랍니다.

| 성희롱 경험                                                                  | 있음       |          | 없음 |
|-------------------------------------------------------------------------|----------|----------|----|
|                                                                         | 직접<br>경험 | 간접<br>경험 |    |
| 1. 상대방이 성차별적이거나 음란한 글, 이미지, 동영상 등을 업무공간에 전시하거나 보<br>내서 불쾌하거나 당황한 적이 있다. |          |          |    |
| 2. 상대방이 성적 신체부위를 고의로 노출하거나 스스로를 만져서 불쾌하거나 당황한 적                         |          |          |    |



① 의사    ② 환자    ③ 환자의 보호자    ④ 상급자    ⑤ 동료    ⑥ 하급자    ⑦ 기타(            )    ⑧ 없음

6. 성희롱이 발생하였을 경우 적극적으로 대응하지 않으셨다면 그 이유가 무엇입니까?

- |                           |                    |
|---------------------------|--------------------|
| ① 대응을 해 봐야 소용이 없다는 생각 때문에 | ⑤ 증거가 없기 때문에       |
| ② 어떻게 해야 할지 몰라서           | ⑥ 인간관계가 걸끄러워 질까봐   |
| ③ 창피해서                    | ⑦ 기분이 나쁘지 않아서      |
| ④ 보복 당할 것 같아서             | ⑧ 기타(            ) |

귀하가 업무 중 성희롱 경험이 있을 경우 어떻게 대처하셨는지 또는 만일 내가 성희롱을 당한다면  
어떻게 대처 할 것 같은지 귀하의 생각과 가장 일치하는 곳에 V 표를 해 주십시오

| 성희롱 대처                                                  | 전혀<br>아니다 | 아니다 | 그저<br>그렇다 | 그렇다 | 매우<br>그렇다 |
|---------------------------------------------------------|-----------|-----|-----------|-----|-----------|
| 1. 나는 성희롱 가해자와 가까이 하지 않으려고 노력했다<br>(또는 할 것이다).          |           |     |           |     |           |
| 2. 나는 그건 중요하지 않은 일이었다고 내 스스로에게 말했다<br>(또는 할 것이다).       |           |     |           |     |           |
| 3. 나는 내가 믿고 있는 사람과 그 성희롱 사건에 대해 논의했다<br>(또는 할 것이다).     |           |     |           |     |           |
| 4. 나는 성희롱 가해자에게 내가 그러한 행동을 싫어한다고 직접 말했다(또는 할 것이다).      |           |     |           |     |           |
| 5. 나는 성희롱이 가해자가 의도적으로 한 행동이었다고 생각했다<br>(또는 할 것이다).      |           |     |           |     |           |
| 6. 나는 성희롱 상황에 대하여 변명을 했다(또는 할 것이다).                     |           |     |           |     |           |
| 7. 나는 성희롱 상황이 벌어진 것에 대해 나 스스로를 비난했다<br>(또는 할 것이다).      |           |     |           |     |           |
| 8. 나는 성희롱 피해 신고기관 또는 우리 기관의 공식적인 신고 부서에 보고한다(또는 할 것이다). |           |     |           |     |           |
| 9. 나는 성희롱 사건 그 자체를 잊으려고 노력했다(또는 할 것이다).                 |           |     |           |     |           |
| 10. 나는 그냥 참는다(또는 참을 것이다).                               |           |     |           |     |           |
