# Supplementary material for: Sexual Harassment Experience, Coping, and Awareness Among Nurses Working in Small- and Medium-Sized Hospitals in South Korea
Source: PubMed Central journal article supplement — SAGE Open Nurs. 2024 Sep 27;10:23779608241281129. doi: 10.1177/23779608241281129 (PMC11437590; doi:10.1177/23779608241281129), 2024-09-27
Supplement: sj-pdf-3-son-10.1177_23779608241281129.pdf [file sj-pdf-3-son-10.1177_23779608241281129.pdf]

# The questionnaire s/scales/guidelines used in this study

## 1. Sexual harassment coping

p.932-933

*Sample A.* One way to explore the number of dimensions that are meaningful and adequate in MDS is to examine how well the modeled distances among the items reflect the actual distances. Stress, a badness-of-fit index, summarizes the adequacy of multi-dimensional solutions (Kruskal, 1964); a stress value of zero indicates a perfect fit of the dimensional configuration to the data, and a solution with a stress value of .10 is considered to adequately represent the data. As shown in Table 3, the stress value for the one-dimensional solution was .20; the stress value for the two-dimensional solution from Sample A was .08, a value considered reasonable for determining adequate dimensionality. This value is also smaller than the mean stress values for random rankings in nonmetric MDS given by Spence and Ogilvie (1973), which suggests that the solution is meaningful. Further, the variance accounted for by the two-dimensional configuration was .96, suggesting that there is little deviation between the modeled and observed distances. Finally, the two-dimensional configuration

Table 2  
*Ten Common Coping With Harassment Questionnaire Items*

| Coping strategy                             | Item                                                         |
|---------------------------------------------|--------------------------------------------------------------|
| Detachment                                  | I told myself it was not really important                    |
| Denial                                      | I tried to forget the whole thing                            |
| Relabel                                     | I assumed he meant well                                      |
| Illusory control (self-blame)               | I blamed myself for what happened                            |
| Endurance                                   | I just put up with it                                        |
| Avoidance                                   | I stayed away from him as much as possible                   |
| Assertion                                   | I told him I didn't like what he was doing                   |
| Seeking institutional/organizational relief | I talked with a supervisor, manager, or union representative |
| Seeking social support                      | I talked to someone about what happened                      |
| Appeasement                                 | I made up some excuse so he would leave me alone             |

*Note.* Items are from the *Coping With Harassment Questionnaire* (CHQ; Fitzgerald, 1990; Fitzgerald et al., 1993). Copyright 1990 by L. F. Fitzgerald.

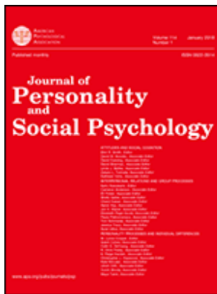

[Journal Information](#)  
[Journal TOC](#)

APA PsycArticles: Journal Article

### Coping with sexual harassment: Reconceptualizing women's resistance.

© Request Permissions

Magley, V. J. (2002). Coping with sexual harassment: Reconceptualizing women's resistance. *Journal of Personality and Social Psychology*, 83(4), 930–946. <https://doi.org/10.1037/0022-3514.83.4.930>

This study explored the underlying structure of women's coping with sexual harassment from a rational-empirical approach. On the basis of multidimensional scaling, clustering, and confirmatory factor analysis across 8 data sets, 4 clusters of coping behaviors emerged, with little variance across the data sets. These clusters bear resemblance to Moos and colleagues' (C. J. Holahan, R. H. Moos, & J. A. Schaefer, 1996; R. Moos, 1992; R. H. Moos & J. A. Schaefer, 1993) distinction between coping strategies that differ in both method and foci. The four clusters that emerged are *behavioral engagement*, *behavioral disengagement*, *cognitive engagement*, and *cognitive disengagement*. This framework provides insight into the complex forms that women's coping with sexual harassment takes and has important legal implications. (APA PsycInfo Database Record (c) 2016 APA, all rights reserved)

## 2. Sexual harassment awareness (recognition).

p.220

### ● 성희롱 인식

성희롱에 대한 인식은 개인이 갖고 있는 성 정체성과 태도에 따라 느끼는 주관적인 인지를 의미하며[15], 본 연구에서는 서울대학교 인권센터[16]에서 개발한 성희롱 인식테스트로 측정하였다. 본 도구는 10개 문항으로 ‘예’(1점), ‘아니오’(0점)로 측정하였으며, ‘아니오’로 응답해야 정답인 문항은 역문항 처리하여 점수가 높을수록 성희롱 인식이 높은 것을 의미한다. 본 연구에서 도구의 신뢰도 KR-20은 .69였다.

KCI 등재

보건관리자의 성희롱과 관련된 경험, 인식, 대처 및 기관의 성희롱 예방 노력에 대한 실태조사

Study on Sexual Harassment-related Experience, Awareness, Coping of Health Care Providers and Institutional Efforts to prevent Sexual Harassme

가정간호학회지

약어 : J Korean Acad Soc Home Care Nurs

2018, vol.25, no.2, pp. 219-229 (11 pages)

DOI : 10.22705/jkashcn.2018.25.2.219

발행기관 : 한국가정간호학회

연구분야 : 의약학 > 간호학

KCI

FWCI

### 3. Experience of sexual harassment

P15.

#### 1) 성희롱의 피해경험

성희롱의 피해경험은 임동진(1999)의 도구를 본 연구자가 수정, 보완한 18문항으로, '직접경험', '간접목격', '아니오'의 경험을 시각적 성희롱 4문항, 언어적 성희롱 9문항, 신체적 성희롱 5문항으로 측정하였다.

**R** A study on damaging experiences effects knowledge and coping for sexual harassment of dental hygienists

통합검색 국내학술논문 **학위논문** 해외학술논문 학술지 단행본 연구보고서 공개강의

#### 치과위생사의 성희롱 피해 경험과 영향, 성희롱 관련 인식 및 대처

저자 [김미은](#)  
발행사항 진주 : 경상대학교 보건대학원, 2015  
학위논문사항 [학위논문\(석사\)-- 경상대학교 보건대학원](#) : 보건학과 보건학 2015. 2  
발행연도 2015  
작성언어 한국어  
주제어 [치과위생사](#) [성희롱](#) [피해경험](#)  
발행국(도시) 경상남도  
기타서명 A Study on Damaging Experiences, Effects, Knowledge and Coping for Sexual Harassment of Dental Hygienist's  
형태사항 vi, 44 p. : 삽도 ; 27 cm  
소장기관 경상국립대학교 도서관
